# Supplementary material for: Speciation of inorganic selenium in natural water by in situ solid-phase extraction using functionalized silica
Source: Royal Society of Chemistry journal article supplement (doi:10.1039/d2ay00903j), 2022-01-01
Supplement: d2ay00903j1.pdf [file d2ay00903j1.pdf]

**Table S1.** Operational conditions for ICP-MS determination of Se

| Parameter                 | Value                                |
|---------------------------|--------------------------------------|
| Plasma power              | 1300 W                               |
| Nebulizer argon flow rate | 0.94 L min <sup>-1</sup>             |
| Auxiliary argon flow rate | 0.7 L min <sup>-1</sup>              |
| Plasma argon flow rate    | 13 L min <sup>-1</sup>               |
| Sampler orifice (nickel)  | 1.1 mm                               |
| Skimmer orifice (nickel)  | 0.7 mm                               |
| Acquisition mode          | Peak-Jumping                         |
| Number of sweeps          | 100                                  |
| Dwell time                | 10 ms                                |
| Acquisition time          | 6 s                                  |
| Isotope                   | <sup>82</sup> Se                     |
| Internal standard         | <sup>115</sup> In, <sup>103</sup> Rh |

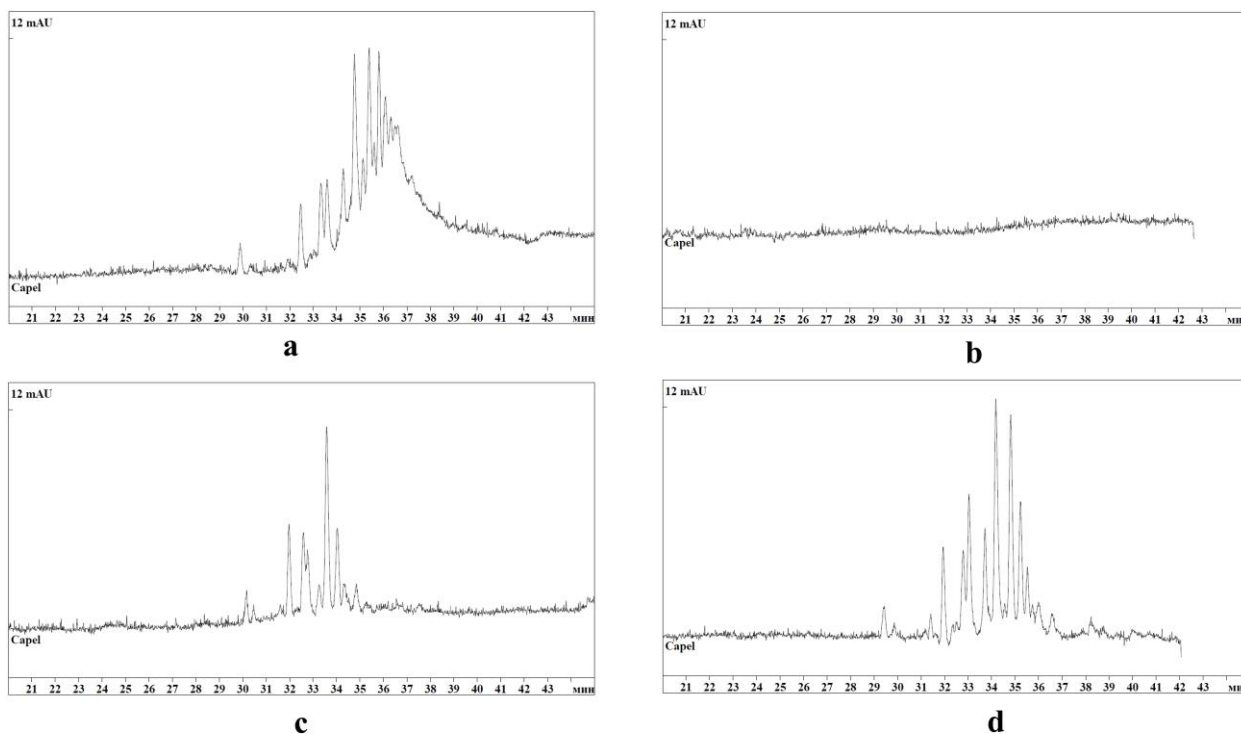

**Figure S1.** Electrophoregrams of the initial PDDG solution (a) and the effluent from the cartridge filled with silica after 0.5 mL (b), 5 mL (c), 10 mL (d)

$C_{\text{PDDG}} = 1 \text{ g L}^{-1}$  (a),  $m_{\text{SiO}_2} = 0.2 \text{ g}$ ; sample injection - 30 mBar·10 s, 25 mM phosphate buffer + 200 mM potassium sulfate,  $U = +15 \text{ kV}$ , capillary diameter 50  $\mu\text{m}$

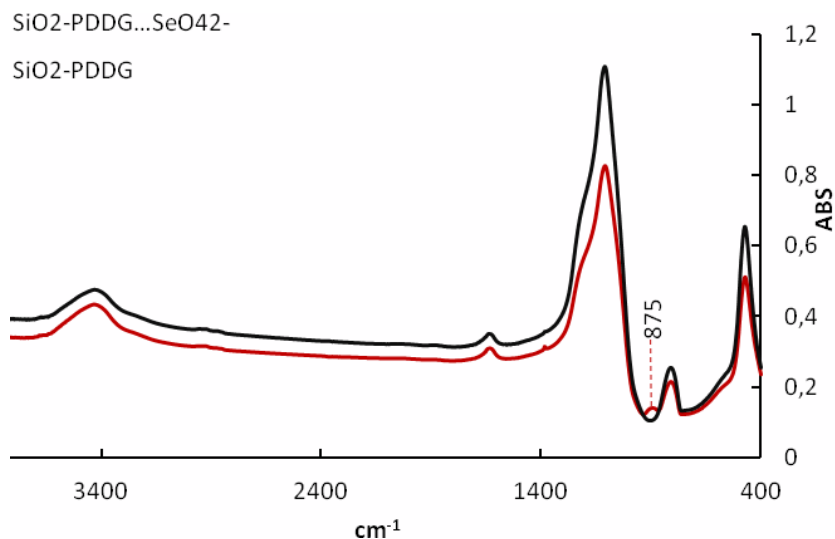

**Figure S2.** FT-IR spectra of SiO<sub>2</sub>-PDDG adsorbent before (black line) and after adsorption of Se(VI) (red line)

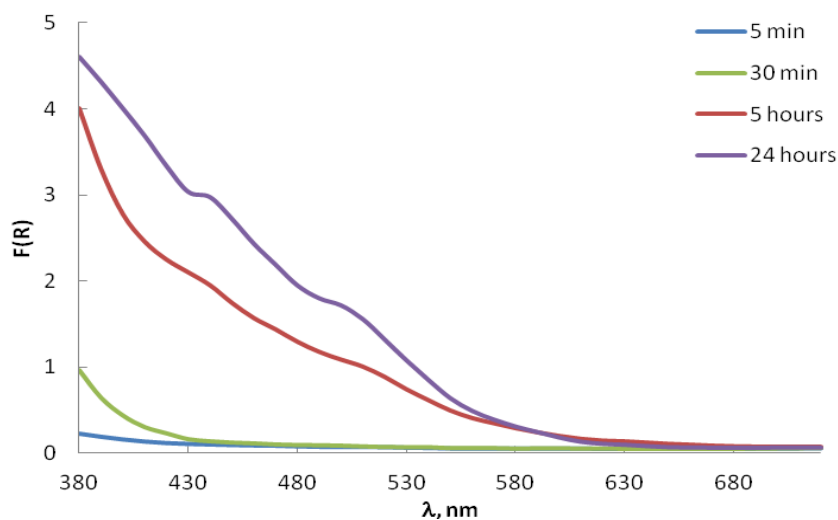

**Figure S3.** Diffuse reflectance spectra of the MPS adsorbent after Se(IV) loading vs. storage time.  $C_{Se} = 100 \mu\text{g mL}^{-1}$ ,  $V = 10 \text{ mL}$ ,  $m_{MPS} = 0.1 \text{ g}$

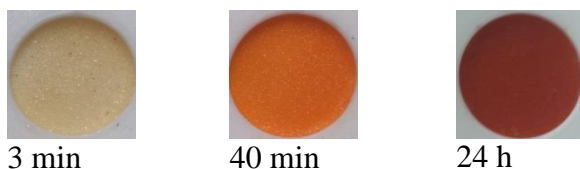

**Figure S4 a.** Photos of MPS adsorbent after loading of 280  $\mu\text{g}$  Se(IV) vs. storage time.

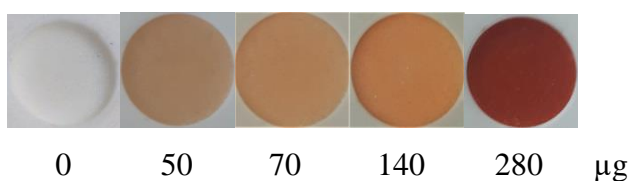

**Figure S4 6.** Photos of the MPS adsorbent after loading of Se(IV) vs. selenium concentration.

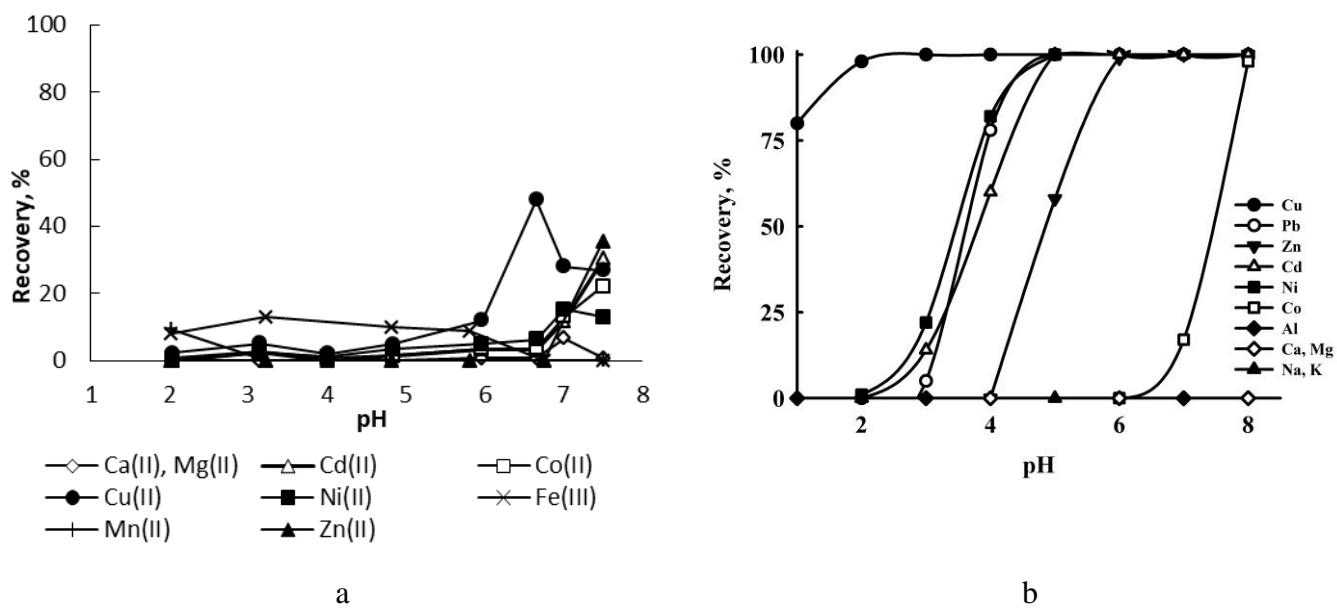

**Figure S5.** Extraction of ion metals by SiO<sub>2</sub>-PDDG (a) and MPS (b) adsorbent vs. pH
